# Supplementary material
Source: Springer Nature journal article supplement (https://www.springermedizin.de/resource/supplementary/12887_2010_377_MOESM9_ESM.pdf/9474970)

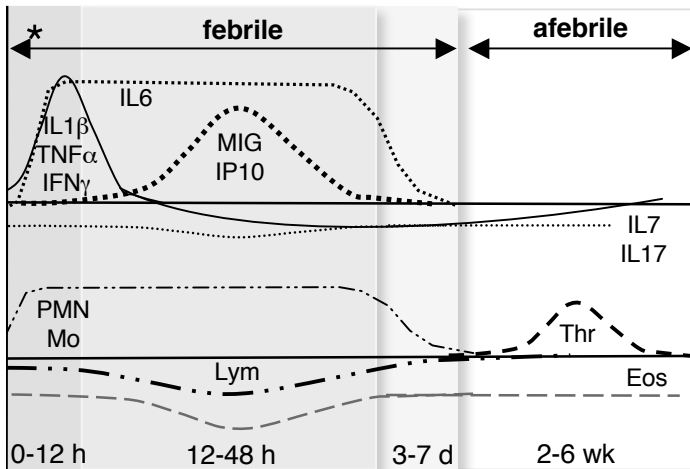

Supplement: MOESM9 [file 9474970]
